# Supplementary material
Source: PubMed Central journal article supplement (PMC7227535)

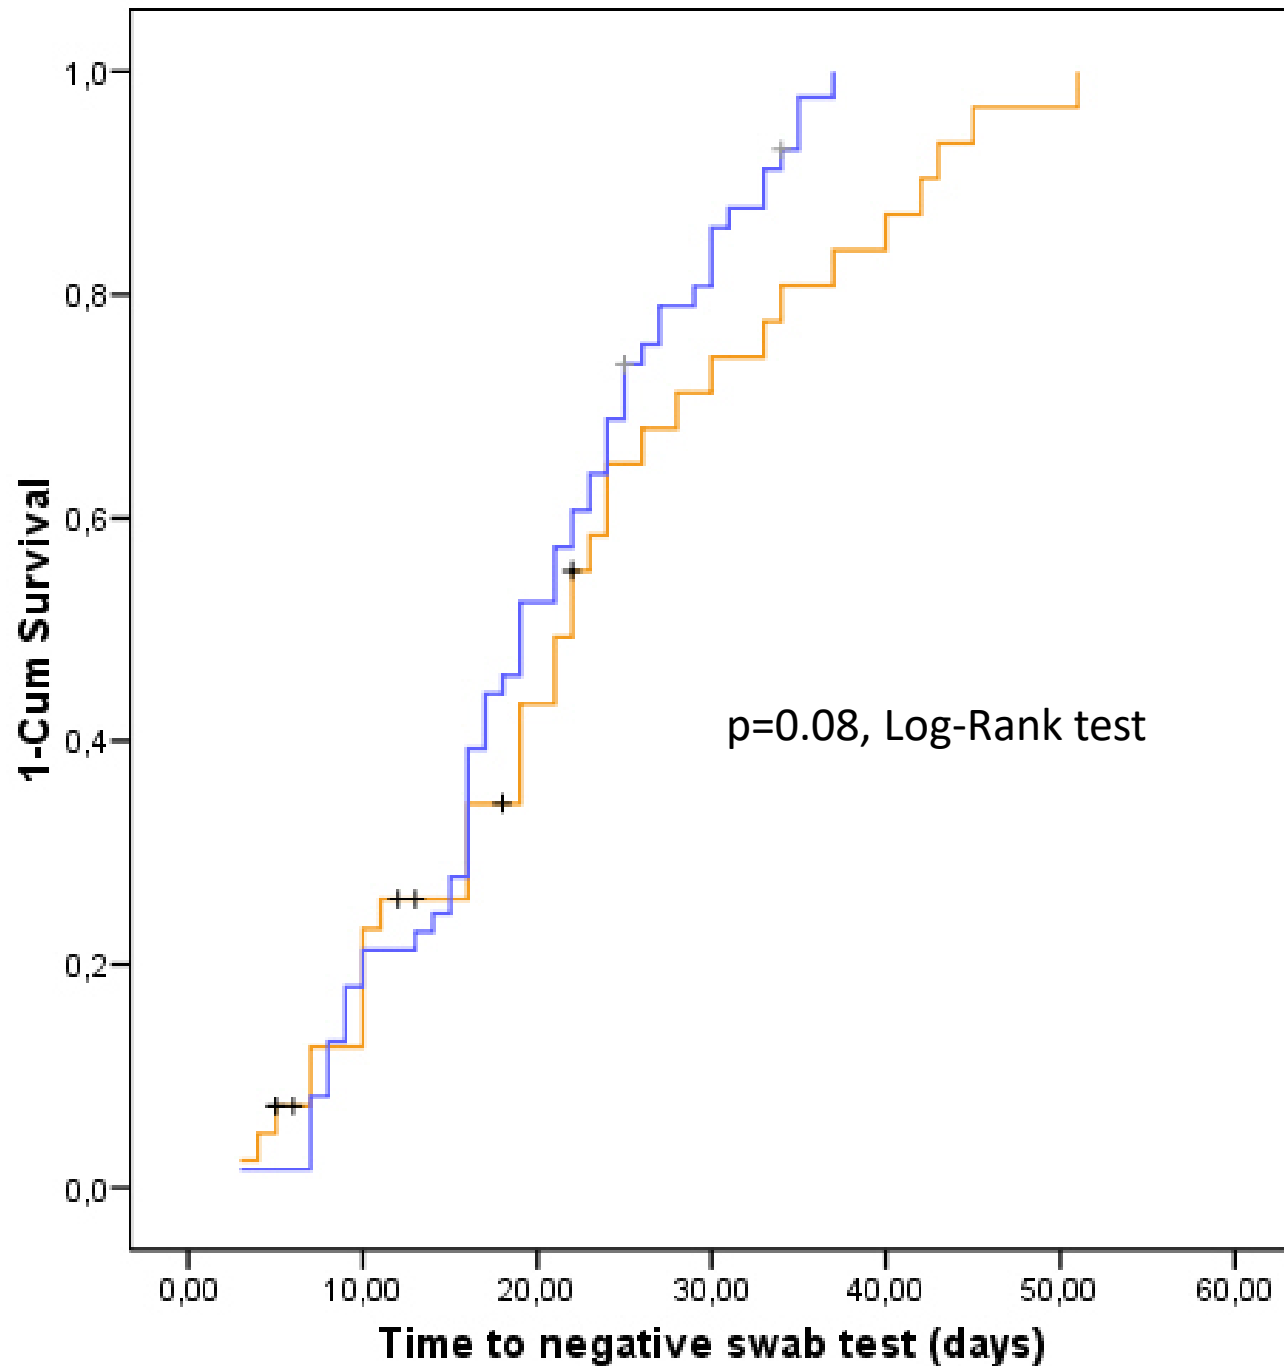

| Group   | Total N. pts | N. Events | Time, days [median, IQR] |
|---------|--------------|-----------|--------------------------|
| SOC     | 61           | 59        | 19 [15-26]               |
| TOCI    | 40           | 34        | 22 [11-33]               |
| Overall | 101          | 93        | 21 [14-27]               |

Supplement: mmc1.pdf [file mmc1.pdf]
